# Supplementary material for: Decrease in quality of life predicts mortality in adult patients with pulmonary arterial hypertension due to congenital heart disease
Source: Springer Nature journal article supplement (doi:10.1007/s12471-015-0666-9), 2015-03-03
Supplement: MOESM1 [file 620446]

## SUPPLEMENTARY DATA

**Table S1.** Baseline Characteristics at start standardized PAH-specific treatment protocol

| <i>Variables</i>                    | <i>All Patients</i> | <i>1 QoL<br/>questionnaire</i> | <i>&gt;1 QoL<br/>questionnaire</i> | <i>p</i> |
|-------------------------------------|---------------------|--------------------------------|------------------------------------|----------|
| Number                              | 61                  | 22                             | 39                                 |          |
| Age, mean $\pm$ SD, y               | 49 $\pm$ 13         | 52 $\pm$ 15                    | 47 $\pm$ 12                        | 0.047    |
| Male, n (%)                         | 26 (43)             | 9 (41)                         | 17 (44)                            | 0.839    |
| Down syndrome, n (%)                | 23 (38)             | 4 (18)                         | 19 (49)                            | 0.018    |
| Eisenmenger syndrome, n (%)         | 48 (79)             | 13 (59)                        | 35 (90)                            | 0.005    |
| Body Mass index, mean $\pm$ SD, kg  | 24 $\pm$ 5          | 25 $\pm$ 6                     | 24 $\pm$ 5                         | 0.494    |
| NYHA class III or IV, n (%)         | 31 (51)             | 16 (73)                        | 15 (39)                            | 0.025    |
| SF36 PCS, mean $\pm$ SD             | 35 $\pm$ 9          | 35 $\pm$ 11                    | 35 $\pm$ 8                         | 0.930    |
| SF36 MCS, mean $\pm$ SD             | 49 $\pm$ 12         | 48 $\pm$ 13                    | 50 $\pm$ 11                        | 0.426    |
| <b>Medication</b>                   |                     |                                |                                    |          |
| -bosentan, n (%)                    | 61 (100)            | 22 (100)                       | 39 (100)                           | 1.000    |
| -diuretics, n (%)                   | 22 (39)             | 7 (39)                         | 15 (39)                            | 0.975    |
| Cardiac surgery, n (%)              | 17 (28)             | 9 (41)                         | 8 (21)                             | 0.006    |
| -Age surgery, median (range), y     | 4 (1-75)            | 4 (2-75)                       | 6 (1-66)                           | 0.867    |
| Saturation in rest, median (IQR), % | 87 (80-93)          | 88 (80-96)                     | 85 (80-91)                         | 0.256    |
| NT-pro-BNP, median (IQR), ng/L      | 466 (218-1209)      | 424 (161-1623)                 | 556 (244-1127)                     | 0.500    |
| 6-MWD, mean $\pm$ SD, m             | 377 $\pm$ 124       | 401 $\pm$ 125                  | 364 $\pm$ 123                      | 0.279    |
| TAPSE, median (IQR), mm             | 19 (16-23)          | 17 (15-22)                     | 19 (16-23)                         | 0.293    |
| SPAP, median (IQR), mmHg            | 89 (71-98)          | 81 (49-91)                     | 91 (76-103)                        | 0.016    |
| <b>Shunt Type</b>                   |                     |                                |                                    |          |
| -pre tricuspid, n (%)               | 11 (18)             | 5 (23)                         | 6 (15)                             |          |
| -post tricuspid, n (%)              | 27 (44)             | 9 (41)                         | 18 (46)                            | 0.769    |
| -complex*, n (%)                    | 23 (38)             | 8 (36)                         | 15 (39)                            |          |

Abbreviations: SF36 PCS, short form health survey of physical health; SF36 MCS, short form health survey of mental health; SD, standard deviation; IQR, interquartile range; QoL, quality of life; 6-MWD, six-minute walk distance; SPAP, systolic pulmonary artery pressure; TAPSE, tricuspid annular plane systolic excursion; NT-pro-BNP, N-terminal pro-brain natriuretic peptide; NYHA functional class, New York Heart Association functional class.

\* Complex shunts included atrioventricular septal defect and univentricular heart.
